1           **MreC and MreD balance the interaction between the elongasome**  
2                                                   **proteins PBP2 and RodA**

3  
4  
5 Xiaolong Liu<sup>1</sup>, Jacob Biboy<sup>2</sup>, Waldemar Vollmer<sup>2</sup>, Tanneke den Blaauwen<sup>1\*</sup>

6  
7   <sup>1</sup> Bacterial Cell Biology, Swammerdam Institute for Life Science, Faculty of  
8 Science, University of Amsterdam, 1098 XH, Amsterdam, The Netherlands.

9   <sup>2</sup> Centre for Bacterial Cell Biology, Institute for Cell and Molecular Biosciences,  
10 Newcastle University, NE2 4AX, Newcastle upon Tyne, United Kingdom.

11  
12 Correspondence: \*T. den Blaauwen, Bacterial Cell Biology and Physiology,  
13 Swammerdam Institute for Life Sciences, University of Amsterdam, P.O. Box  
14 94215, 1090 GE Amsterdam, The Netherlands

15  
16  
17 **Running Title:** Checks and Balances of Elongasome in *Escherichia coli*

18  
19 **Key words:** elongasome, PBP2, RodA, MreBCD, conformation, FRET.

24 **Abstract**

25 Rod-shape of most bacteria is maintained by the elongasome, which  
26 mediates the synthesis and insertion of peptidoglycan into the cylindrical part  
27 of the cell wall. The elongasome contains several essential proteins, such as  
28 RodA, PBP2, and the MreBCD proteins, but how its activities are regulated  
29 remains poorly understood. Using *E. coli* as a model system, we investigated  
30 the interactions between core elongasome proteins *in vivo*. Our results show  
31 that PBP2 and RodA form a complex mediated by their transmembrane and  
32 periplasmic parts and independent of their catalytic activity. MreC and MreD  
33 also interact directly with PBP2. MreC elicits a change in the interaction  
34 between PBP2 and RodA, which is suppressed by MreD. The cytoplasmic  
35 domain of PBP2 is required for this suppression. We hypothesize that the *in*  
36 *vivo* measured PBP2-RodA interaction change induced by MreC corresponds  
37 to the conformational change in PBP2 as observed in the MreC-PBP2 crystal  
38 structure, which was suggested to be the “on state” of PBP2. Our results  
39 indicate that the balance between MreC and MreD determines the activity of  
40 PBP2, which could open new strategies for antibiotic drug development.

41

42 **Importance**

43 The cell envelope of *Escherichia coli* bears the protective and shape-  
44 determining peptidoglycan layer sandwiched between the outer and inner  
45 membranes. Length growth in bacteria is accomplished by a protein complex  
46 termed elongasome. We used Förster Resonance Energy Transfer (FRET)  
47 that reports not only on whether proteins interact with each other but also on  
48 conformational changes during interactions, to investigate how the

49 elongasome might be activated. RodA and PBP2 provide the peptidoglycan  
50 glycosyltransferase and transpeptidase activities needed to synthesize new  
51 peptidoglycan during length growth, respectively, and PBP2 activates RodA.  
52 We show that the interactions between MreC and MreD with PBP2-RodA alter  
53 the nature of the interaction between PBP2 and RodA and hypothesis that the  
54 corresponding conformational change in the PBP2-RodA complex allows  
55 switching between the 'on' and 'off' states of the elongasome.

56

## 57 **Introduction**

58 Bacterial cells are surrounded by a peptidoglycan layer that maintains their  
59 shape and protects them from bursting due to the osmotic pressure. The  
60 biosynthesis of peptidoglycan is the target of many antibiotics that are used in  
61 clinical therapies for bacterial infections. The spread of antibiotic resistant  
62 pathogens calls urgently for the development of novel antibiotics. In depth  
63 knowledge on peptidoglycan synthesis will aid in the development of effective  
64 screening assays to select cell wall synthesis inhibitors. Peptidoglycan is a  
65 mesh-like heteropolymer of glycan chains of GlcNAc-MurNAc-peptide  
66 subunits that are connected by peptide cross-links (1). Peptidoglycan  
67 synthesis begins in the cytoplasm with synthesis of UDP-GlcNAc and UDP-  
68 MurNAc-pentapeptide (2). Two following membrane steps, catalyzed by MraY  
69 and MurG, assemble the precursor lipid II (3, 4), which is flipped to the  
70 periplasmic side of the cytoplasmic membrane by lipid II flippase(s) MurJ  
71 and/or FtsW (5–7). GlcNAc-MurNAc pentapeptide units are polymerized into  
72 glycan chains and the peptides are cross-linked to bridge the glycan stands  
73 by peptidoglycan synthases to expand the peptidoglycan layer while the

74 carrier lipid is recycled (8–10). Most rod-shaped bacteria employ two protein  
75 complexes, elongasome and divisome, to guide peptidoglycan synthesis  
76 during lateral growth and cell division, respectively (11).

77 In *E. coli*, the divisome contains more than twenty proteins. Assembly  
78 of the divisome starts with positioning the FtsZ ring at midcell together with  
79 other early divisome proteins, such as FtsA, ZipA, ZapA and FtsEX, to form  
80 the early divisome (12–14). Subsequently, the late divisome proteins, FtsK,  
81 FtsBLQ, FtsW, PBP3 and FtsN, are recruited (15). These proteins localize to  
82 midcell in an interdependent order (15, 16). Among these proteins, FtsW,  
83 PBP3 and PBP1B provide the peptidoglycan synthesis activity during septum  
84 synthesis (10, 17, 18). PBP1B has both glycosyltransferase (GTase) and  
85 transpeptidase (TPase) activity (19), while FtsW and PBP3 (also called FtsI)  
86 only have GTase activity and TPase activity, respectively (10). Although the  
87 mechanisms of peptidoglycan synthesis regulation is not fully understood,  
88 recent studies showed that the cell division proteins have competing effects  
89 and either inhibit (FtsQLB complex) or stimulate the activities of FtsW-PBP3-  
90 PBP1B (20–22).

91 Proteins that are known to be part of the elongasome are the  
92 cytoplasmic membrane associated actin homologue MreB, the bitopic  
93 membrane proteins RodZ, MreC and PBP2, and the integral membrane  
94 proteins MreD and RodA (Fig. 1a). MreB polymerizes into short filaments that  
95 rotate around the cylindrical part of the cell (23, 24). The rotation of MreB is  
96 believed to drive the topography of the insertion of peptidoglycan into the  
97 lateral wall (23, 25–27). Bacterial two hybrid analysis showed that MreB  
98 interacts with MreC, but not with MreD (28), while RodZ interacts strongly with

99 itself, MreB and MreC (28, 29) (Fig.1b), and these interactions are essential to  
100 maintain bacterial morphology (28, 30–32). RodA and PBP2 form a stable  
101 subcomplex (33) and provide GTase and TPase activity, respectively, during  
102 cylindrical peptidoglycan synthesis (9, 34, 35). This subcomplex also shows a  
103 circumferential motion that is similar to that of MreB. The bifunctional GTase-  
104 TPase PBP1A interacts with PBP2 and stimulates its activity (18). Because  
105 PBP1A moves independently of the rotation of PBP2 and MreB, it is thought  
106 not to be part of the core elongasome (18, 36). However, the function and role  
107 of most elongasome proteins are still poorly understood. How peptidoglycan  
108 synthesis is activated and regulated during elongation is still the key question.  
109 In this study, combining genetics, microscopy and Förster Resonance Energy  
110 Transfer (FRET), we investigated the functions of, and interactions between,  
111 these core elongasome proteins. The transfer of energy between a donor  
112 fluorescent-protein fusion and an acceptor fluorescent-protein fusion (FRET)  
113 is very sensitive to distance, which even allows the detection of  
114 conformational changes that affect this distance (7). Our results indicate that  
115 MreC and MreD modulate the interaction between PBP2 and RodA in  
116 oppositely, which likely reflects a mechanism of elongasome activation and  
117 regulation.

118

## 119 **Results**

### 120 **RodA and PBP2 activities are not essential for their interaction**

121 RodA and PBP2 form a stable peptidoglycan synthesizing subcomplex in the  
122 cytoplasmic membrane as detected by FRET (33). To investigate whether this  
123 interaction relies on their enzymatic activities, RodA<sup>R109A</sup> and RodA<sup>Q207R</sup>

124 versions, which were predicted to be inactive based on studies on its  
125 homologue FtsW, were constructed (Supplementary Fig. 1) (5, 38). As  
126 expected, these mutants could not complement the temperature sensitive  
127 RodA strain LMC882 at the non-permissive temperature, and the RodA<sup>Q207R</sup>  
128 variant even showed dominant negative effects at the permissive temperature  
129 (Fig. 2a). Subsequently, N-terminal mCherry fused versions (33, 34) of the  
130 inactive RodA proteins were expressed to test their interaction with mKO-  
131 PBP2<sup>WT</sup> by FRET (Fig. 2b). In our FRET system, the direct fused mCherry-  
132 mKO tandem was used as positive control (33). To account for possible  
133 interactions between proteins due to crowding in the cytoplasmic membrane,  
134 an integral membrane protein unrelated to peptidoglycan synthesis, GlpT<sup>3,34</sup>,  
135 was fused to mKO, and its interaction with mCh-RodA was detected as  
136 negative control. The acceptor FRET efficiency values ( $E_{fA}$ ) of all FRET  
137 samples were calculated using our previously published mKO-mCh FRET  
138 spectral unmixing method (33) (Supplementary Fig. 2a). An  $E_{fA}$  value of  $31.0$   
139  $\pm 4.0\%$  was observed for the tandem control (Fig. 2b and Table 1), which is  
140 comparable to the published data (33). An  $E_{fA}$  value of  $1.1 \pm 3.5\%$  was  
141 observed for the RodA-GlpT negative control (Fig. 2b and Table 1). FRET  
142 experiments with PBP2<sup>WT</sup> and RodA<sup>R109A</sup> or RodA<sup>Q207R</sup> yielded  $E_{fA}$  values of  
143  $12.5 \pm 1.9\%$  and  $12.7 \pm 1.2\%$ , respectively, which are comparable to the  $E_{fA}$   
144 value of  $12.7 \pm 1.7\%$  of wild type RodA, indicating an interaction between  
145 PBP2<sup>WT</sup> and all RodA versions (Fig. 2b, Supplementary Fig 2a and Table 1).  
146 To determine whether the activity of PBP2 was required for the interaction  
147 with RodA, we expressed the inactive variant PBP2<sup>S330C</sup>, which is not able to  
148 bind benzylpenicillin (35). PBP2<sup>S330C</sup> had a strong dominant negative effect

149 during the complementation in the PBP2 temperature sensitive strain LMC582  
150 (Fig. 2c), while the detected  $E_{fA}$  value of PBP2<sup>S330C</sup>-RodA<sup>WT</sup> remained  $10.9 \pm$   
151  $0.5\%$ , which was slightly below the  $E_{fA}$  value of PBP2<sup>WT</sup>-RodA<sup>WT</sup> (Fig. 2b and  
152 Table 1). These results imply that the activities of RodA and PBP2 are not  
153 needed for their interaction.

154

### 155 **The transmembrane and periplasmic parts of PBP2 contribute to its** 156 **interaction with RodA**

157 To reveal which part of PBP2 interacts with RodA, two domain swap mutants  
158 of PBP2 were constructed. The cytoplasmic N-terminus (NT) and or the N-  
159 terminal region with the transmembrane-helix (NT-TMH) of PBP2 were  
160 replaced by the corresponding N-terminal stretches of MalF, a bitopic  
161 membrane protein that has been previously used in domain swap studies  
162 (39–41), to yield Mal<sup>FNT</sup>PBP2 and Mal<sup>F37</sup>PBP2, respectively (Fig. 3a). Both  
163 versions of PBP2 were able to localize to the membrane but showed  
164 dominant negative effects, indicating the essentiality of the replaced parts (Fig.  
165 3b). The replacement of the NT of PBP2 did not change its interaction with  
166 RodA, as the detected  $E_{fA}$  value remained  $14.4 \pm 1.1\%$ , which was not  
167 significantly different compared to that of the interaction between RodA and  
168 wild type PBP2 (Fig. 3c, Table 1 and Supplementary Fig. 2b). However,  
169 replacement of the TMH of PBP2 significantly reduced the  $E_{fA}$  value between  
170 PBP2 and RodA to  $8.2 \pm 1.3\%$ , which reflected an apparent distance increase  
171 from 8.6 nm to 9.8 nm between the two proteins (42) (Fig. 3c and Table 1).  
172 This decrease in distance was not caused by a change in amount of  
173 measured fluorescence for the RodA and PBP2 fusions expressed in the cells

174 (Supplementary Fig. 2b), or due to the shorter transmembrane helix after  
175 replacement (Fig. 3a). The average rise per residue in transmembrane helices  
176 is 0.15 nm (43), therefore the two amino acid residues shorter helix in  
177 Mal<sup>F37</sup>PBP2 (Fig. 3a) could maximally change the distance between donor and  
178 acceptor fluorophores by 0.3 nm. The still considerably higher  $E_{fA}$  value  
179 compared to the negative control indicates that the transmembrane helix  
180 alone is not sufficient for the interaction between PBP2 and RodA and that the  
181 periplasmic domain of PBP2 is also involved in this interaction (Fig. 3d).

182

### 183 **MreC interacts with PBP2 and affects PBP2-RodA interaction**

184 A recent study of PBP2-MreC from *Helicobacter pylori* showed two different  
185 structural conformations of PBP2 in the MreC-bound and unbound forms,  
186 respectively<sup>43</sup> (Fig. 4 a). The authors proposed that the binding of MreC to the  
187 periplasmic hydrophobic zipper of PBP2 induces a conformational change in  
188 PBP2 and a switch from an off state into an on state (44). In our FRET system  
189 about 1000 copies of the mKO fusion proteins per cell are expressed from a  
190 plasmid (45). The ~180 endogenous copies of MreC molecules (46) are not  
191 sufficient to activate the majority of the by plasmid expressed mKO-PBP2  
192 molecules. Therefore, we hypothesize that most of the mildly overexpressed  
193 PBP2 versions remain in the off state conformation (Fig. 4b, left). We  
194 reasoned that the interaction between PBP2 and RodA could be sensitive to  
195 possible conformational changes of PBP2, if we would additionally express  
196 MreC to balance the molecule numbers of both proteins. To this end we first  
197 tested the interaction between a functional mCh-MreC (28) fusion and mKO-  
198 PBP2 by FRET measurements. The observed  $E_{fA}$  value of  $5.1 \pm 1.2\%$



199 indicates a direct interaction between PBP2 and MreC (Fig. 4c, table 1 and  
200 Supplementary Fig. 3), which is in agreement with the structural study of  
201 PBP2-MreC from *Helicobacter pylori* (44).

202

203 We next we employed a three-plasmids-FRET system that expressed MreC  
204 from a third plasmid when testing the interaction between PBP2 and RodA  
205 (Fig. 4d, Table 2 and Supplementary Fig. 4). A control strain contained an  
206 empty plasmid instead of the MreC-expression plasmid. In the presence of the  
207 empty plasmid, the calculated  $Ef_A$  values for the tandem (positive control) and  
208 RodA-GlpT (negative control) were  $30.4 \pm 1.8\%$  and  $2.3 \pm 1.3\%$ , respectively  
209 (Fig. 4d and Table 2). These  $Ef_A$  values remained unchanged in the presence  
210 of MreC expressed from the third plasmid (Fig. 4d and Table 2). Interestingly,  
211 the  $Ef_A$  value for the RodA-PBP2 interaction was significantly reduced to  $4.9 \pm$   
212  $0.6\%$  in the presence of MreC, compared with the  $Ef_A$  of  $8.8 \pm 1.1\%$  in the  
213 presence of empty plasmid (Fig. 4d and Table 2). These results indicate that  
214 MreC changes the interaction between PBP2 and RodA, which would be  
215 consistent with a conformational change of PBP2 from the off state to the on  
216 state proposed from the crystal structures (44) (Fig. 4b, middle).

217

### 218 **MreD suppresses the MreC-mediated change in the PBP2-RodA** 219 **interaction**

220 During our study, we noticed that overexpression of MreC caused  
221 morphological defects of the wild type strain, increasing the diameter of *E. coli*  
222 cells (Fig. 4e and Supplementary Fig. 5). Interestingly, the co-expression of  
223 MreD together with MreC suppressed these morphological defects and

224 restored the wild type phenotype (Fig. 4e and Supplementary Fig. 5). To  
225 further investigate this effect, we aimed to express an N-terminal functional  
226 mCherry fusion of MreD (30) which is an integral membrane protein with 6  
227 predicted transmembrane helices and both termini localized in the cytoplasm  
228 (Supplementary Fig. 6). Consistent with this topology model we readily  
229 observed fluorescence signals for N-terminal fused GFP-MreD (30) and mKO-  
230 MreD versions, which could not be possible if the N-terminus of MreD would  
231 localize in the oxidative periplasm where GFP and mKO do not mature (37).  
232 Similarly as for MreC, the overexpression of MreD alone resulted in  
233 morphological defects of *E. coli* cells (Fig. 4e and supplementary Fig. 5).

234

235 To study the role of MreD in the elongasome, FRET experiments were  
236 designed to detect a possible interaction with PBP2. The  $E_fA$  value of  $4.3 \pm$   
237  $1.1\%$  indicated a direct interaction between MreD and PBP2 (Fig. 4c, Table 1  
238 and Supplementary Fig. 3). Subsequently, the interaction between MreC and  
239 PBP2 was measured by FRET in the presence of MreD. The calculated  $E_fA$   
240 between MreC and PBP2 was significantly reduced from  $5.1 \pm 1.2\%$  to  $3.3 \pm$   
241  $0.5\%$  ( $p=0.0078$ ) when MreD was co-expressed (Fig. 4c, Table 1 and  
242 Supplementary Fig. 3). Since MreC reduced the  $E_fA$  of RodA-PBP2 from  $8.8 \pm$   
243  $1.1\%$  to  $4.9 \pm 0.5\%$ , it was possible that MreD altered the effect of MreC on  
244 the RodA-PBP2 interaction. Therefore, the three-plasmid FRET experiment  
245 was applied to detect the interaction between RodA and PBP2 in the  
246 presence of MreCD. Interestingly, the  $E_fA$  value of RodA-PBP2 was restored  
247 to  $9.2 \pm 1.5\%$ , which was comparable with the  $E_fA$  in the presence of the third,  
248 empty plasmid (Fig. 4d and Table 2). These combined results suggest a

249 regulatory mechanism by which MreC interacts with PBP2 and changes its  
250 conformation, while MreD interacts with MreC and PBP2 to prevent this  
251 conformational change PBP2. These conformational changes could  
252 correspond the proposed on and off states of PBP2 as published (44) (Fig. 4  
253 a and b).

254

### 255 **The cytoplasmic part of PBP2 is important for the interplay with the** 256 **MreCD proteins**

257 As showed before, the cytoplasmic NT part of PBP2 has an essential  
258 unknown function rather than being involved in the RodA-PBP2 interaction  
259 (Fig. 3). We considered that the NT of PBP2 might be important for its self-  
260 interaction and or interactions with other partner proteins. However, the  $E_f$   
261 values of  $Mal^{FNT}PBP2$  with wild type PBP2, MreC and MreD were not different  
262 from those of wild type PBP2 (Fig. 4d, Supplementary Fig. 7 and Table 1).  
263 Interestingly, the  $E_f$  value of the interaction between MreC and wild type  
264 PBP2, but not the  $Mal^{FNT}PBP2$ , was reduced by the co-expression of MreD  
265 (Fig. 4d, Table 1 and Supplementary Fig. 4c). Similarly, in the three-plasmid  
266 FRET experiments, MreD was not able to suppress the MreC-mediated  
267 change in the  $Mal^{FNT}PBP2$ -RodA interaction; the  $E_f$  value of RodA- $Mal^{FNT}PBP2$   
268 FRET remained at  $5.5 \pm 1.7\%$  in presence of MreCD, rather than being  
269 restored to  $9.2 \pm 1.5\%$  as in the RodA-PBP2<sup>WT</sup> experiments (Fig. 4d, Table 2  
270 and Supplementary Fig. 4c). Together, these results indicate that the  
271 cytoplasmic part of PBP2 plays an important role in the MreCD-mediated  
272 regulation of the interaction between PBP2 and RodA.

273

## 274 **MreCD proteins do not alter PBP2 self-interaction**

275 So far our results has shown that MreC and MreD have opposite effects on  
276 the interaction between RodA and PBP2. In contrast, the interaction between  
277 two PBP2 molecules (17) was not significantly affected upon overexpression  
278 of MreC or MreCD, as the calculated  $Ef_A$  values for the PBP2-PBP2  
279 interaction remained unchanged compared to the values for the expression of  
280 the third empty plasmid (Fig. 4d and Table 2). RodA was also found to interact  
281 with itself (Table 1 and Supplementary Fig. 7). Likely PBP2 and RodA function  
282 as a complex of dimers, which might also allow simultaneously synthesis of  
283 multiple glycan strand as has been proposed (47–49).

284

## 285 **Effect of mecillinam on the interaction between RodA and PBP2**

286 As showed above, both the transmembrane helix and periplasmic part of  
287 PBP2 contribute to its interaction with RodA (Fig. 3). The binding of MreC to  
288 the periplasmic hydrophobic zipper domain of PBP2, which presumably  
289 changes the conformation of PBP2 from off state to on state, reduces the  
290 detected  $Ef_A$  between RodA and PBP2 (Fig. 4d and e). Interestingly, the  
291 PBP2 specific inhibitor mecillinam, also caused a reduction in the FRET  
292 efficiency of the interaction between RodA and PBP2. The RodA-PBP2<sup>WT</sup>  
293 interaction pair yielded a reduced  $Ef_A$  of  $8.6 \pm 1.1\%$  in the presence of  
294 mecillinam (33), comparing with the  $Ef_A$  of  $12.7 \pm 1.7\%$  without mecillinam (Fig.  
295 2, Table 1 and Supplementary Fig. 8). Since mecillinam binds specifically to  
296 the periplasmic TPase active site of PBP2, a possible explanation could be  
297 that binding of mecillinam reduces the affinity between the periplasmic parts  
298 of PBP2 and RodA, but does not interfere with the interaction between their

299 transmembrane regions. Indeed, after replacing the transmembrane helix of  
300 PBP2 to abolish this part of the interaction (RodA-MalF37PBP2), mecillinam  
301 further reduced the  $E_{fA}$  value to  $3.0 \pm 2.0\%$  (Supplementary Fig. 8 and Table  
302 1), consistent with an almost complete loss of the interaction between RodA  
303 and MalF37PBP2. That mecillinam causes disruption of only one out of two  
304 interacting regions between PBP2 and RodA is also in agreement with the  
305 observations that it does not disrupt the structure of the elongasome (50). The  
306 inactive mutant PBP2<sup>S330C</sup>, which cannot bind benzylpenicillin (35), still  
307 responded to mecillinam and showed a similar  $E_{fA}$  reduction as PBP2<sup>WT</sup>  
308 (Supplementary Fig. 8 and Table 1). This suggests that although the inactive  
309 mutant PBP2<sup>S330C</sup> does not bind mecillinam covalently, it still interacts with it.

310

### 311 **PBP2<sup>L61R</sup> stays in the off state and activates RodA**

312 A recent study reported a version of PBP2 in which Leu61 was replaced by  
313 Arg (PBP2<sup>L61R</sup>) that could suppress an MreC defect, and was proposed to  
314 stay in the on state conformation mimicking activation by MreC (51). If this  
315 would be the case, the RodA-PBP2<sup>L61R</sup> pair would be expected to have a  
316 reduced FRET efficiency, since the MreC activated RodA-PBP2<sup>WT</sup> pair  
317 resulted in a reduction in FRET efficiency (Fig 4d). Therefore, we constructed  
318 an N-terminal mKO fusion of PBP2<sup>L61R</sup> to test the interactions with its partner  
319 proteins. Surprisingly, the  $E_{fA}$  for RodA-PBP2<sup>L61R</sup> remained  $12.8 \pm 2.8\%$ ,  
320 which was comparable with the  $E_{fA}$  of RodA-PBP2<sup>WT</sup> that was presumably in  
321 the off state (Fig. 5a and b, Table 1 and Supplementary Fig. 9a). Mecillinam  
322 reduces the  $E_{fA}$  value of the RodA-PBP2<sup>L61R</sup> interaction to  $9.7 \pm 2.2\%$ , which  
323 was also comparable with its effect on the RodA-PBP2<sup>WT</sup> interaction (Table 1

324 and Fig. S8), indicating that the TPase active side of PBP2<sup>L61R</sup> is still  
325 accessible to mecillinam. Unfortunately, the co-expression of PBP2<sup>L61R</sup>  
326 together with either MreC or MreD alone, or both together, was not possible in  
327 most cases, as FRET cells repeatedly lost the mKO-PBP2<sup>L61R</sup> signal upon  
328 induction (Table 1), suggesting toxicity of these combinations. The cells did  
329 not lose the mKO signal in only two out of six attempts to co-express MreC  
330 and PBP2<sup>L61R</sup>. Of those samples the calculated  $E_f$  value of the MreC and  
331 PBP2<sup>L61R</sup> pair remained at  $5.4 \pm 1.7\%$ , which was comparable with MreC-  
332 PBP2<sup>WT</sup> (Fig. 4a and Table 1). These results suggest that the hyperactive  
333 mutant PBP2<sup>L61R</sup> likely behaves similarly as wild type PBP2 in the interaction  
334 with its partner proteins.

335

336 Having observed these unexpected results, we continued to further  
337 characterize the hyperactive PBP2<sup>L61R</sup>. Consistent with its reported  
338 functionality (51), we observed that mKO-PBP2<sup>L61R</sup> was capable to support  
339 growth of the PBP2(TS) strain LMC582 at the non-permissive temperature  
340 (Supplementary Fig. 9b). However, the expression of mKO-PBP2<sup>L61R</sup> resulted  
341 in longer and thinner cells (Fig. 5c and Supplementary Fig. 9c), and in  
342 reduced sensitivity of cells to the MreB inhibitor A22 (Fig. 5c) as reported (51).  
343 Interestingly, cells expressing PBP2<sup>L61R</sup> were hypersensitive to mecillinam  
344 (Fig. 5c and d). These results indicate potential defects in the peptidoglycan  
345 layer of cells expressing PBP2<sup>L61R</sup>, and these defects may be tolerable under  
346 undisturbed growth conditions but are exacerbated in the presences of  
347 mecillinam. Considering that PBP2<sup>L61R</sup> stimulates the GTase activity of RodA  
348 *in vitro* (51) and our results on the cellular interactions, it was possible that the

349 L61R exchange in PBP2 enhances only the activity of RodA and has no effect  
350 on PBP2's TPase activity. *In vitro* peptidoglycan synthesis experiments  
351 showed that inactivation of PBP2 by mecillinam resulted in longer glycan  
352 chains synthesized by a PBP1A-PBP2 complex (18), hence we wondered  
353 whether the presence of PBP2<sup>L61R</sup> affected peptidoglycan synthesis in the cell.  
354 We prepared peptidoglycan and analyzed its composition from cells  
355 expressing PBP2<sup>L61R</sup>, wild type PBP2, and the control membrane protein GlpT.  
356 As predicted, the peptidoglycan from all strains retained a similar extent of  
357 peptide cross-linkage. By contrast, only the peptidoglycan from the PBP2<sup>L61R</sup>  
358 expressing cells contained unusually long glycan chains with a mean length  
359 ~52 disaccharide units (Table 3). The peptidoglycan of the strain  
360 overexpressing wild-type PBP2 had a mean glycan chain length of ~38 units,  
361 and the mean glycan chain lengths of the other strains were between 40-43  
362 disaccharide units (Table 3, Supplementary Table 3). A stimulating effect of  
363 PBP2<sup>L61R</sup> on RodA's GTase activity would be consistent with the previously  
364 observed A234T mutation in RodA that suppressed the morphological defects  
365 of MreC mutants (51), and would also explain why PBP2<sup>L61R</sup> could only poorly  
366 restore survival and rod-shape in cells depleted of MreCD or RodZ (51). The  
367 tolerance to A22 and changes in MreB dynamics in the PBP2<sup>L61R</sup> background  
368 (51) could also be explained by the enhanced RodA GTase activity by  
369 PBP2<sup>L61R</sup>; a direct interaction between RodA and MreB was detected with a  
370  $E_f$  value of  $5.5\% \pm 1.7\%$  (Table 1 and Supplementary Fig. 10). All together  
371 these results indicate that the 'hyperactive' PBP2<sup>L61R</sup> likely has unchanged  
372 TPase activity itself but is probably in the off state conformation in the  
373 absence of MreC (44). The changes in cell morphology, the resistance to A22

374 and sensitivity to mecillinam, the partial compensation of MreCD-RodZ  
375 depletion and MreB dynamic changes are all likely due to an enhanced  
376 GTase activity of RodA (and perhaps PBP1A) (18, 51), which results into  
377 longer glycan chains in the peptidoglycan mesh.

378

## 379 **Discussion**

### 380 **Peptidoglycan synthesis by the elongasome and divisome**

381 In this work we aimed to reveal the regulation of peptidoglycan synthesis  
382 during length growth. Recent studies revealed a possible mechanism for the  
383 regulation of septal peptidoglycan synthesis by FtsBLQ and FtsN (19–21, 52–  
384 54). In this model, the FtsBLQ subcomplex inhibits the activities of PBP3  
385 (consequently also inhibiting FtsW) and PBP1B, and keeps septal  
386 peptidoglycan synthesis in check. A small amount of FtsN is already present  
387 at pre-septal sites together with ZipA and the class A PBPs, PBP1A and  
388 PBP1B (55). However, only once FtsN accumulates at higher levels it is able  
389 to relieve the suppression of FtsBLQ on the peptidoglycan synthases, thereby  
390 activating septal peptidoglycan synthesis. During length growth, the  
391 elongasome proteins, such as MreC, MreD, PBP2, RodA and RodZ, localize  
392 in the lateral membrane, which makes it a challenge to investigate their  
393 cellular dynamics. Thus, it is still largely unknown how the elongasome  
394 regulates and coordinates peptidoglycan synthesis.

395

### 396 **MreCD proteins regulate the interaction between RodA and PBP2**

397 In this study, we showed that RodA and PBP2 form a subcomplex  
398 independent of their biochemical activities (Fig. 2). This interaction requires



399 the transmembrane helix and periplasmic parts of PBP2 (Fig. 3). *In vivo* FRET  
400 experiments revealed that MreC interacts with directly with PBP2, which  
401 modulated the interaction between PBP2 and RodA (Fig. 4). Surprisingly,  
402 MreD also interacts with PBP2 and but has an opposite effect, as it reverses  
403 the PBP2-RodA interaction change stimulated by MreC (Fig. 4). This is similar  
404 to the regulation of septal peptidoglycan synthesis where FtsN interacts with  
405 itself and accumulates at midcell (56, 57), and this accumulation is assumed  
406 to abolish the suppression of the peptidoglycan synthesis complex FtsW-  
407 PBP3-PBP1B by FtsBLQ. When comparing the cellular numbers of these  
408 proteins synthesized per generation (46), we noticed that the average number  
409 of FtsN molecules per cell is about 2 times higher than that of FtsBLQ and  
410 FtsW-PBP3 proteins. The number of MreC molecules is also about 2 times  
411 higher than that of MreD and PBP2-RodA molecules (46). MreC, but not MreD,  
412 is also reported to interact with itself, and the structural data showed that two  
413 molecules of MreC bind to one PBP2 molecule (44). Together with these  
414 published data, our results indicate that the balance between the MreC and  
415 MreD determines the nature of the interaction between PBP2 and RodA.  
416 Structural data show that the interaction between MreC and PBP2 causes a  
417 conformational change in PBP2 that was suggested to correspond to its  
418 activation from the off state to the on state (44). This conformational change  
419 could correspond to the change in the interaction between PBP2 and RodA  
420 induced by MreC. And likely, when MreD is co-expressed with MreC, the  
421 reversed change in the interaction between PBP2 and RodA could  
422 correspond to the PBP2 conformational change from the on state to the off  
423 state. This potential of MreC and MreD to affect the RodA-PBP2 interaction

424 could reflect the regulation of elongasome activity and peptidoglycan  
425 synthesis during length growth. The overexpression of either MreC or MreD  
426 would shift this balance and result in over activation or suppression of PBP2-  
427 RodA activities, and cause morphological defects (Fig. 4e and Supplementary  
428 Fig. 7).

429         Based on our observations, we propose a model for the regulation of  
430 PBP2 (elongasome) activity and cylindrical peptidoglycan synthesis (Fig. 6).  
431 The peptidoglycan synthases RodA and PBP2 form a stable subcomplex.  
432 MreC stimulates and activates PBP2 and RodA, while MreD interferes with  
433 the PBP2 MreC interaction to keep PBP2 activity and peptidoglycan synthesis  
434 in check. The further binding and accumulation of MreC to PBP2 would  
435 eventually outcompete MreD, which will activate PBP2 and consequently  
436 initiate peptidoglycan synthesis. Because hydrolytic activity is required to  
437 allow insertion of newly synthesized peptidoglycan into the existing mesh (58,  
438 59), a balanced regulation is likely needed to avoid premature glycan strand  
439 synthesis. Consequently, the elongasome, like the divisome, must have a  
440 mechanism to sense whether all partners are at the right position to act. A  
441 well-regulated moment for the switching on of peptidoglycan synthesis by  
442 balancing the MreCD ratio is likely part of such a regulatory system.

443

## 444 **Materials and Methods**

### 445 **Media, strains, plasmids and primers**

446 LB (10 g tryptone, 5 g yeast extract and 10 g NaCl, per liter) and Gb4 (6.33g  
447  $K_2HPO_4 \cdot 3H_2O$ , 2.95g  $KH_2PO_4$ , 1.05 g  $(NH_4)_2SO_4$ , 0.10 g  $MgSO_4 \cdot 7H_2O$ , 0.28  
448 mg  $FeSO_4 \cdot 7H_2O$ , 7.1 mg  $Ca(NO_3)_2 \cdot 4H_2O$ , 4 mg thiamine, 2 mg uracil, 2 mg

449 lysine, 2 mg thymine, and 0.5 % glucose, per liter, pH 7.0) were used for cell  
450 cultures in rich and minimal medium, respectively, as indicated. Final  
451 concentrations for antibiotics were: 100  $\mu\text{g}\cdot\text{L}^{-1}$  ampicillin, 50  $\mu\text{g}\cdot\text{L}^{-1}$  kanamycin  
452 and 25  $\mu\text{g}\cdot\text{L}^{-1}$  chloramphenicol.

453

454 *E. coli* strains and plasmids used in this study are listed in supplementary  
455 Table 1. Primers used in this study were listed in supplementary Table 2. The  
456 plasmids were constructed as following:

457

458 **pXL29**. Plasmid pXL28 and pWA004 were digested with *EcoRI* and *HindIII*  
459 restriction enzymes, the generated (GGS)<sub>2</sub>-GlpT expressing gene and  
460 pSAV057-mKO linear vector were ligated together to generate the mKO-  
461 (GGS)<sub>2</sub>-GlpT expressing plasmid.

462

463 **pXL36, pXL40, pXL44, pXL48, pXL56 and pXL63**. Plasmids pXL36 and  
464 pXL40 that expressing mCherry-fused RodA<sup>R109A</sup> and RodA<sup>Q207R</sup> were  
465 generated from pSAV047-RodA by mutagenesis PCR using primer pairs  
466 priXL61-priXL61 and priXL69-priXL70, respectively. To construct non-fused  
467 version of RodA variants, wild type *rodA* gene was amplified using primer  
468 priXL59 and priXL60 from the MG1655 genomic DNA and ligated into empty  
469 pSAV057 vector, to generate plasmid pXL63. The two mutants plasmids were  
470 generated in the same way as described above from pXL63. mKO fused  
471 RodA plasmid pXL56 was constructed by cutting and pasting the *rodA* gene  
472 from pSAV047-RodA to the pSAV058 plasmid with *EcoRI* and *HindIII*  
473 restriction enzymes.

474

475 **pXL148, pXL149, pXL158 and pXL159.** The PBP2 domain swap plasmids  
476 were constructed by Gibson assembly (60). For N-terminus replacement,  
477 primer pairs priXL146-priXL258 and priXL147-priXL259 were used for PCR  
478 from plasmid pWA004. The PCR products were purified after *DpnI* digestion  
479 and assembled to generate pXL148 that excludes the N-terminus of PBP2.  
480 For pXL149, the primer pair priXL258-priXL260 was used to amplify the entire  
481 pWA004 plasmid excluding the first 45 residues. Primer pair priXL261 and  
482 priXL263 was used to amplify the first 37 residues of MalF from MG1655  
483 genome. The PCR products were purified after *DpnI* digestion and assembled  
484 to generate pXL149 plasmid. The PBP2<sup>S330C</sup> and PBP2<sup>L61R</sup> plasmids were  
485 constructed with mutagenesis PCR from the pWA004 plasmid using primer  
486 pairs priXL274-priXL275 and priXL276-priXL277, respectively.

487

488 **pXL165, pXL166 and pXL169.** *mreC*, *mreCD* and *mreD* genes were  
489 amplified from MG1655 genome using primer pairs priXL282-priXL286,  
490 priXL282-priXL283 and priXL299-priXL283, respectively, and cloned into  
491 plasmid pSAV047 with *EcoRI* and *HindIII* restriction enzymes, to generate the  
492 mCherry fused version of these genes.

493

494

495 **pXL167 and pXL168.** The third plasmids used in the three-plasmids FRET  
496 experiments. *mreC* and *mreCD* genes were cloned into plasmid pSG4K5 (61)  
497 with Gibson assembly, respectively, and the *ptrcdown* promoter was introduced  
498 to control the protein expression. Primer pair priXL294-priXL295 was used to

499 amplify the linear vector from pSG4K5. Primer pair priXL296-pp15 was used  
500 to amplify the *p<sub>trcdown</sub>* promoter. Primer pairs pXL284-priXL297 and priXL284-  
501 priXL298 were used to amplify the *mreCD* and *mreD* genes, respectively.

502

### 503 **Bacterial growth, morphology and protein localization**

504 For general growth experiments in rich medium, overnight cultures (37 °C)  
505 were diluted 1:1000 into fresh LB medium with 0.5% glucose and the required  
506 antibiotics, and grew to OD<sub>600</sub> around 0.2 at 37 °C. Cultures were further  
507 diluted 1:5 into fresh LB medium with required antibiotics, and induced with 15  
508 μM IPTG for 2 mass doubling at 37 °C (OD<sub>600</sub> reached around 0.2).

509

510 For complementation experiments, temperature sensitive strains expressing  
511 the mutant plasmids were grown as described above at 30 °C. Cultures were  
512 further diluted 1:5 into fresh LB medium with required antibiotics, and induced  
513 with 15 μM IPTG for 2 mass doubling at 30 °C and 42 °C, respectively (OD<sub>600</sub>  
514 reached around 0.2).

515

516 After induction, cells were fixed with FAGA (2.8 % formaldehyde and 0.04 %  
517 glutaraldehyde, final concentration) for 15 minutes and centrifuged at 7000  
518 rpm for 10 min at room temperature. Cell pellets were suspended and washed  
519 3 times with PBS (pH7.2) buffer. Subsequently, bacterial morphology and  
520 protein localization were imaged by wide field phase contrast and  
521 fluorescence microscopy. Specially, cells expressing the mKO fused proteins  
522 were firstly matured at 37 °C overnight before imaging by microscopy.

523

## 524 **FRET experiment and data analysis**

525 Protein interactions were detected by FRET as described previously (33, 37,  
526 62). For the FRET experiments, mCherry and mKO fluorescent proteins were  
527 used as acceptor and donor fluorophores, respectively. LMC500 strain was  
528 co-transformed with the FRET pairs that were to be detected. In each FRET  
529 experiment, the empty-vector reference, mCherry reference, mKO reference  
530 were included to be able to calculate the  $E_{fA}$  by unmixing of the measured  
531 FRET pair spectrum in its individual components; background, mCherry, mKO  
532 and sensitized emission spectra. A tandem fusion of mKO-mCherry was used  
533 as positive control, and the mCherry-RodA and mKO-GlpT pair was used as  
534 negative control. After transformation, FRET strains were firstly grown in LB  
535 medium (with antibiotics and 0.5% glucose) overnight at 37 °C, and diluted  
536 1:1000 into fresh medium and grown to  $OD_{600}$  around 0.2 at 37 °C.  
537 Subsequently, FRET strains were diluted 1:500 into Gb4 medium and grown  
538 to steady state at 28 °C ( $OD_{450}$  was kept below 0.2). All FRET strains were  
539 induced with 15  $\mu$ M IPTG (and treated with mecillinam at 2  $mg \cdot L^{-1}$   
540 concentration as indicated) for two mass doubling before FAGA fixation. After  
541 fixation, FRET cells were pelleted by centrifugation at 7000rpm at room  
542 temperature and washed 3 times with PBS buffer (pH 7.2). Then all samples  
543 were incubated at 37 °C overnight and stored at 4 °C for 1 extra day before  
544 measured with spectrofluorimeter (Photon Technology International, NJ).  
545 Emission spectra of acceptor and donor fluorophores were measured through  
546 6-nm slit widths with 1 second integration time per scanned nm for 3 times  
547 averaging. Filters 587/11 nm (587/11 nm BrightLine single band-pass filter,  
548 Semrock, New York, NY, USA) and 600nm long-pass (LP) filter (Chroma

549 Technology Corp., Bellows Falls, VT) were used for excitation and emission of  
550 acceptor fluorophore (mCherry), while 541/12 nm (Semrock) and 550 nm long  
551 pass (Chroma) filters were used for mKO excitation and emission,  
552 respectively. For calculation, measurement of PBS buffer was subtracted from  
553 all samples, and the empty-cell reference was subtracted from the donor and  
554 acceptor spectra. The FRET efficiencies were calculated as described  
555 previously (37, 62).

556

557 For three plasmids FRET, a third plasmid (expressing MreC or expressing  
558 MreCD both) was introduced into the whole two plasmids FRET system.  
559 Empty pSG4K5 vector was also introduced as a control to correct for the  
560 reduction in FRET efficiency due to the burden of maintaining three plasmids.

561

## 562 **Spot assay**

563 To test the sensitivity of *E. coli* strains to A22 and mecillinam, LMC500 strain  
564 was transformed with pWA004 (PBP2<sup>WT</sup>) or pXL159 (PBP2<sup>L61R</sup>). Strains  
565 expressing each construct were grown in LB medium as described above  
566 without induction. Cell cultures were diluted with varying dilution factors (Fig.  
567 4C). A drop of 10  $\mu$ l cell culture from each dilution was loaded on the LB agar  
568 dish (with chloramphenicol, 15  $\mu$ M IPTG, 10  $\mu$ g·mL<sup>-1</sup> A22 or 2  $\mu$ g·mL<sup>-1</sup>  
569 mecillinam) and incubated overnight at 37 °C.

570

## 571 **Peptidoglycan analysis**

572 Peptidoglycan sacculi were prepared from *E. coli* cells, digested with cellosyl  
573 (kind gift from Hoechst, Germany), reduced with sodium borohydride and

574 analyzed by high pressure liquid chromatography as described (Separation  
575 and quantification of mucopeptides with high-performance liquid  
576 chromatography) (63).

577

## 578 **Microscopy**

579 Bacterial cell samples were immobilized on 1.3% agarose pads (w/v in Gb4  
580 medium) and imaged under microscopy. Fluorescence microscopy was  
581 carried out either with an Olympus BX-60 fluorescence microscope equipped  
582 with an UPlanApo 100×/N.A. 1.35 oil Iris Ph3 objective, or with a Nikon  
583 Eclipse Ti microscope equipped with a C11440-22CU Hamamatsu ORCA  
584 camera, a CFI Plan Apochromat DM 100× oil objective, an Intensilight HG  
585 130W lamp and the NIS elements software (version 4.20.01). Images were  
586 acquired using the Micro Manager 1.4 plugin for ImageJ, and analyzed with  
587 Coli-Inspector supported by the ObjectJ plugin for ImageJ (version 1.49v) (64).

588

589

## 590 **Acknowledgements**

591 X.L. was supported by the Chinese Scholarship Council (File  
592 No.201406220123). W.V. received funding from the Wellcome Trust  
593 (101824/Z/13/Z). We thank Lisa Atkinson for preparation of peptidoglycan  
594 sacculi and Prof. Thomas Bernhardt for the gift of modeled *E. coli* PBP2  
595 structures(51).

596

597

598



## 599 **Author contributions**

600 X.L and T.B. designed and analyzed all the experiments. X.L. performed all  
601 experiments. Jacob Biboy and Waldemar Vollmer performed the  
602 peptidoglycan analysis experiment and analyzed these data. X.L. and T.B.  
603 analyzed all FRET data and wrote the manuscript.

604

605

## 606 **Conflicting interests**

607 The authors declare no conflicting interests.

608

## 609 **References**

- 610 1. Vollmer W, Blanot D, De Pedro MA. 2008. Peptidoglycan structure and  
611 architecture. FEMS Microbiol Rev 32:149–167.  
612 <https://doi.org/10.1111/j.1574-6976.2007.00094.x>
- 613 2. Mengin-Lecreulx D, Flouret B, Van Heijenoort J. 1982. Cytoplasmic  
614 steps of peptidoglycan synthesis in *Escherichia coli*. J Bacteriol  
615 151:1109–1117. <https://doi.org/10.1111/j.1574-6976.2008.00104.x>
- 616 3. Bouhss A, Trunkfield AE, Bugg TDH, Mengin-Lecreulx D. 2008. The  
617 biosynthesis of peptidoglycan lipid-linked intermediates. FEMS  
618 Microbiol Rev. <https://doi.org/10.1111/j.1574-6976.2007.00089.x>
- 619 4. van Heijenoort J. 2007. Lipid Intermediates in the Biosynthesis of  
620 Bacterial Peptidoglycan. Microbiol Mol Biol Rev 71:620–635.  
621 <https://doi.org/10.1128/MMBR.00016-07>
- 622 5. Mohammadi T, Sijbrandi R, Lutters M, Verheul J, Martin NI, Den  
623 Blaauwen T, De Kruijff B, Breukink E. 2014. Specificity of the transport  
624 of lipid II by FtsW in *Escherichia coli*. J Biol Chem 289:14707–14718.  
625 doi:10.1074/jbc.M114.557371
- 626 6. Sham L-T, Butler EK, Lebar MD, Kahne D, Bernhardt TG, Ruiz N. 2014.  
627 MurJ is the flippase of lipid-linked precursors for peptidoglycan  
628 biogenesis. Science (80- ) 345:220–222.  
629 <https://doi.org/10.1126/science.1254522>
- 630 7. Sieger B, Schubert K, Donovan C, Bramkamp M. 2013. The lipid II  
631 flippase RodA determines morphology and growth in *Corynebacterium*  
632 *glutamicum*. Mol Microbiol 90:966–982.  
633 <https://doi.org/10.1111/mmi.12411>
- 634 8. Sauvage E, Kerff F, Terrak M, Ayala JA, Charlier P. 2008. The  
635 penicillin-binding proteins: Structure and role in peptidoglycan  
636 biosynthesis. FEMS Microbiol Rev 32:234–258.  
637 <https://doi.org/10.1111/j.1574-6976.2008.00105.x>

- 638 9. Meeske AJ, Riley EP, Robins WP, Uehara T, Mekalanos JJ, Kahne D,  
639 Walker S, Kruse AC, Bernhardt TG, Rudner DZ. 2016. SEDS proteins  
640 are a widespread family of bacterial cell wall polymerases. *Nature* 1–15.  
641 <https://doi.org/10.1038/nature19331>
- 642 10. Taguchi A, Welsh MA, Marmont LS, Lee W, Sjodt M, Kruse AC, Kahne  
643 D, Bernhardt TG, Walker S. 2019. FtsW is a peptidoglycan polymerase  
644 that is functional only in complex with its cognate penicillin-binding  
645 protein. *Nat Microbiol.* <https://doi.org/10.1038/s41564-018-0345-x>
- 646 11. Den Blaauwen T, De Pedro MA, Nguyen-Distèche M, Ayala JA. 2008.  
647 Morphogenesis of rod-shaped sacculi. *FEMS Microbiol Rev* 32:321–344.  
648 <https://doi.org/10.1111/j.1574-6976.2007.00090.x>
- 649 12. Pichoff S, Lutkenhaus J. 2005. Tethering the Z ring to the membrane  
650 through a conserved membrane targeting sequence in FtsA. *Mol*  
651 *Microbiol* 55:1722–1734. [https://doi.org/10.1111/j.1365-](https://doi.org/10.1111/j.1365-2958.2005.04522.x)  
652 [2958.2005.04522.x](https://doi.org/10.1111/j.1365-2958.2005.04522.x)
- 653 13. Schmidt KL, Peterson ND, Kustus RJ, Wissel MC, Graham B, Phillips  
654 GJ, Weiss DS. 2004. A Predicted ABC Transporter , FtsEX , Is Needed  
655 for Cell Division in *Escherichia coli*. *J Bacteriol* 186:785–793.  
656 <https://doi.org/10.1128/JB.186.3.785-793.2004>
- 657 14. Hale CA, De Boer PAJ. 1997. Direct binding of FtsZ to ZipA, an  
658 essential component of the septal ring structure that mediates cell  
659 division in *E. coli*. *Cell* 88:175–185. [https://doi.org/10.1016/S0092-](https://doi.org/10.1016/S0092-8674(00)81838-3)  
660 [8674\(00\)81838-3](https://doi.org/10.1016/S0092-8674(00)81838-3)
- 661 15. Aarsman MEG, Piette A, Fraipont C, Vinkenvleugel TMF, Nguyen-  
662 Distèche M, Den Blaauwen T. 2005. Maturation of the *Escherichia coli*  
663 divisome occurs in two steps. *Mol Microbiol* 55:1631–1645.  
664 <https://doi.org/10.1111/j.1365-2958.2005.04502.x>
- 665 16. den Blaauwen T, Hamoen LW, Levin PA. 2017. The divisome at 25: the  
666 road ahead. *Curr Opin Microbiol* 36:85–94.  
667 <https://doi.org/10.1016/j.mib.2017.01.007>
- 668 17. Van der Ploeg R, Verheul J, Vischer NOE, Alexeeva S, Hoogendoorn E,  
669 Postma M, Banzhaf M, Vollmer W, Den Blaauwen T. 2013.  
670 Colocalization and interaction between elongasome and divisome  
671 during a preparative cell division phase in *Escherichia coli*. *Mol*  
672 *Microbiol* 87:1074–1087. <https://doi.org/10.1111/mmi.12150>
- 673 18. Banzhaf M, van den Berg van Sapparo B, Terrak M, Fraipont C, Egan  
674 A, Philippe J, Zapun A, Breukink E, Nguyen-Distèche M, den Blaauwen  
675 T, Vollmer W. 2012. Cooperativity of peptidoglycan synthases active in  
676 bacterial cell elongation. *Mol Microbiol* 85:179–194.  
677 <https://doi.org/10.1111/j.1365-2958.2012.08103.x>
- 678 19. Ranjit DK, Jorgenson MA, Young KD. 2017. PBP1B  
679 Glycosyltransferase and Transpeptidase Activities Play Different  
680 Essential Roles during the De Novo Regeneration of Rod Morphology in  
681 *Escherichia coli*. *J Bacteriol* 199:1–17.  
682 <https://doi.org/10.1128/JB.00612-16>
- 683 20. den Blaauwen T, Luirink J. 2019. Checks and Balances in Bacterial Cell  
684 Division. *MBio* 10:1–6. <https://doi.org/10.1128/mBio.00149-19>
- 685 21. Boes A, Olatunji S, Breukink E, Terrak M. 2019. Regulation of the  
686 peptidoglycan polymerase activity of PBP1b by antagonist actions of the  
687 core divisome proteins FtsBLQ and FtsN. *MBio* 10:1–16.

- 688 <https://doi.org/10.1128/mBio.01912-18>  
689 22. Egan AJF, Biboy J, van't Veer I, Breukink E, Vollmer W. 2015. Activities  
690 and regulation of peptidoglycan synthases. *Philos Trans R Soc B Biol*  
691 *Sci* 370:20150031. <https://doi.org/10.1098/rstb.2015.0031>  
692 23. van Teeffelen S, Wang S, Furchtgott L, Huang KC, Wingreen NS,  
693 Shaevitz JW, Gitai Z. 2011. The bacterial actin MreB rotates, and  
694 rotation depends on cell-wall assembly. *Proc Natl Acad Sci* 108:15822–  
695 15827. <https://doi.org/10.1073/pnas.1108999108>  
696 24. Errington J. 2015. Bacterial morphogenesis and the enigmatic MreB  
697 helix. *Nat Rev Micro* 13:241–248. <https://doi.org/10.1038/nrmicro3398>  
698 25. White CL, Gober JW. 2012. MreB: Pilot or passenger of cell wall  
699 synthesis? *Trends Microbiol* 20:74–79.  
700 <https://doi.org/10.1016/j.tim.2011.11.004>  
701 26. Strahl H, Bürmann F, Hamoen LW. 2014. The actin homologue MreB  
702 organizes the bacterial cell membrane. *Nat Commun* 5:1–11.  
703 <https://doi.org/10.1038/ncomms4442>  
704 27. Garner EC, Bernard R, Wang W, Zhuang X, Rudner DZ, Mitchison T.  
705 2011. Coupled, circumferential motions of the cell wall synthesis  
706 machinery and MreB filaments in *B. subtilis*. *Science* (80- ) 333:222–5.  
707 <https://doi.org/10.1126/science.1203285>  
708 28. Bendezú FO, Hale CA, Bernhardt TG, De Boer PAJ. 2009. RodZ (YfgA)  
709 is required for proper assembly of the MreB actin cytoskeleton and cell  
710 shape in *E. coli*. *EMBO J* 28:193–204.  
711 <https://doi.org/10.1038/emboj.2008.264>  
712 29. Ikebe R, Kuwabara Y, Chikada T, Niki H, Shiomi D. 2018. The  
713 periplasmic disordered domain of RodZ promotes its self-interaction in  
714 *Escherichia coli*. *Genes to Cells* 23:307–317.  
715 <https://doi.org/10.1111/gtc.12572>  
716 30. Kruse T, Bork-Jensen J, Gerdes K. 2005. The morphogenetic MreBCD  
717 proteins of *Escherichia coli* form an essential membrane-bound  
718 complex. *Mol Microbiol* 55:78–89. [https://doi.org/10.1111/j.1365-  
719 2958.2004.04367.x](https://doi.org/10.1111/j.1365-2958.2004.04367.x)  
720 31. Colavin A, Shi H, Huang KC. 2018. RodZ modulates geometric  
721 localization of the bacterial actin MreB to regulate cell shape. *Nat*  
722 *Commun* 9:1280. <https://doi.org/10.1038/s41467-018-03633-x>  
723 32. Morgenstein RM, Bratton BP, Nguyen JP, Ouzounov N, Shaevitz JW,  
724 Gitai Z. 2015. RodZ links MreB to cell wall synthesis to mediate MreB  
725 rotation and robust morphogenesis. *Proc Natl Acad Sci U S A*  
726 112:12510–12515. <https://doi.org/10.1073/pnas.1509610112>  
727 33. van der Ploeg R, Goudelis ST, den Blaauwen T. 2015. Validation of  
728 FRET assay for the screening of growth inhibitors of *Escherichia coli*  
729 reveals elongasome assembly dynamics. *Int J Mol Sci* 16:17637–17654.  
730 <https://doi.org/10.3390/ijms160817637>  
731 34. Emami K, Guyet A, Kawai Y, Devi J, Wu LJ, Allenby N, Daniel RA,  
732 Errington J. 2017. RodA as the missing glycosyltransferase in *Bacillus*  
733 *subtilis* and antibiotic discovery for the peptidoglycan polymerase  
734 pathway. *Nat Microbiol* 2:1–8.  
735 <https://doi.org/10.1038/nmicrobiol.2016.253>  
736 35. Takasuga A, Adachi H, Ishino F, Matsushashi M, Ohta T, Matsuzawa H.  
737 1988. Identification of the penicillin-binding active site of penicillin-

- 738 binding protein 2 of *Escherichia coli*. J Biochem 104:822–826.  
739 <https://doi.org/10.1093/oxfordjournals.jbchem.a122556>
- 740 36. Cho H, Wivagg CN, Kapoor M, Barry Z, Rohs PDA, Suh H, Marto JA,  
741 Garner EC, Bernhardt TG. 2016. Bacterial cell wall biogenesis is  
742 mediated by SEDS and PBP polymerase families functioning semi-  
743 Autonomously. Nat Microbiol 1.  
744 <https://doi.org/10.1038/nmicrobiol.2016.172>
- 745 37. Meiresonne NY, van der Ploeg R, Hink MA, den Blaauwen T. 2017.  
746 Activity-related conformational changes in D,D-carboxypeptidases  
747 revealed by in vivo periplasmic Förster resonance energy transfer assay  
748 in *Escherichia coli*. MBio 8:1–18. <https://doi.org/10.1128/mBio.01089-17>
- 749 38. Pastoret S, Fraipont C, Blaauwen T Den, Aarsman MEG, Thomas A,  
750 Basseur R, Nguyen-diste M. 2004. Functional analysis of the cell  
751 division protein FtsW of *Escherichia coli*. J Bacteriol 186:8370–8379.  
752 <https://doi.org/10.1128/JB.186.24.8370-8379.2004>
- 753 39. Oldham ML, Khare D, Quioco FA, Davidson AL, Chen J. 2007. Crystal  
754 structure of a catalytic intermediate of the maltose transporter. Nature  
755 450:515–521. <https://doi.org/10.1038/nature06264>
- 756 40. Goehring NW, Robichon C, Beckwith J. 2007. Role for the nonessential  
757 N terminus of FtsN in divisome assembly. J Bacteriol 189:646–649.  
758 <https://doi.org/10.1128/JB.00992-06>
- 759 41. Meiresonne NY, Consoli E, Mertens LMY, Chertkova AO, Goedhart J,  
760 den Blaauwen T. 2019. Superfolder mTurquoise2 ox optimized for the  
761 bacterial periplasm allows high efficiency *in vivo* FRET of cell division  
762 antibiotic targets. Mol Microbiol 111:1025–1038.  
763 <https://doi.org/10.1111/mmi.14206>
- 764 42. Müller SM, Galliardt H, Schneider J, Barisas BG, Seidel T. 2013.  
765 Quantification of Förster resonance energy transfer by monitoring  
766 sensitized emission in living plant cells. Front Plant Sci 4:1–20.  
767 <https://doi.org/10.3389/fpls.2013.00413>
- 768 43. Pauling L, Corey RB, Branson HR. 1951. The Structure of Proteins:  
769 Two Hydrogen-Bonded Helical Configurations of the Polypeptide Chain.  
770 Proc Natl Acad Sci U S A 37:205–211. doi: [10.1073/pnas.37.4.205](https://doi.org/10.1073/pnas.37.4.205)
- 771 44. Contreras-Martel C, Martins A, Ecobichon C, Trindade DM, Matteï P-J,  
772 Hicham S, Hardouin P, Ghachi M El, Boneca IG, Dessen A. 2017.  
773 Molecular architecture of the PBP2–MreC core bacterial cell wall  
774 synthesis complex. Nat Commun 8:776. <https://doi.org/10.1038/s41467-017-00783-2>
- 775
- 776 45. Alexeeva S, Gadella TWJ, Verheul J, Verhoeven GS, Den Blaauwen T.  
777 2010. Direct interactions of early and late assembling division proteins  
778 in *Escherichia coli* cells resolved by FRET. Mol Microbiol 77:384–398.  
779 <https://doi.org/10.1111/j.1365-2958.2010.07211.x>
- 780 46. Li GW, Burkhardt D, Gross C, Weissman JS. 2014. Quantifying  
781 absolute protein synthesis rates reveals principles underlying allocation  
782 of cellular resources. Cell 157:624–635.  
783 <https://doi.org/10.1016/j.cell.2014.02.033>
- 784 47. Scheffers D-J, Pinho MG. 2005. Bacterial Cell Wall Synthesis: New  
785 Insights from Localization Studies. Microbiol Mol Biol Rev 69:585 LP –  
786 607. <https://doi.org/10.1128/MMBR.69.4.585-607.2005>
- 787 48. Holtje J V. 1998. Growth of the stress-bearing and shape-maintaining

- 788 murein sacculus of *Escherichia coli*. Microbiol Mol Biol Rev 62:181–203.  
789 49. Holtje J-V. 1996. A hypothetical holoenzyme involved in the replication  
790 of the murein sacculus of *Escherichia coli*. Microbiology 142:1911–1918.  
791 <https://doi.org/10.1099/13500872-142-8-1911>
- 792 50. Karczmarek A, Baselga RMA, Alexeeva S, Hansen FG, Vicente M,  
793 Nanninga N, Den Blaauwen T. 2007. DNA and origin region segregation  
794 are not affected by the transition from rod to sphere after inhibition of  
795 *Escherichia coli* MreB by A22. Mol Microbiol 65:51–  
796 63. <https://doi.org/10.1111/j.1365-2958.2007.05777.x>
- 797 51. Rohs PDA, Buss J, Sim SI, Squyres GR, Srisuknimit V, Smith M, Cho H,  
798 Sjodt M, Kruse AC, Garner EC, Walker S, Kahne DE, Bernhardt TG.  
799 2018. A central role for PBP2 in the activation of peptidoglycan  
800 polymerization by the bacterial cell elongation machinery. PLoS Genet  
801 14:1–25. <https://doi.org/10.1371/journal.pgen.1007726>
- 802 52. Kureisaite-Ciziene D, Varadajan A, McLaughlin SH, Glas M, Montón  
803 Silva A, Luirink R, Mueller C, den Blaauwen T, Grossmann TN, Luirink J,  
804 Löwe J. 2018. Structural Analysis of the Interaction between the  
805 Bacterial Cell Division Proteins FtsQ and FtsB. MBio 9.  
806 <https://doi.org/10.1128/mBio.01346-18>
- 807 53. Egan AJF, Jean NL, Koumoutsi A, Bougault CM, Biboy J, Sassine J,  
808 Solovyova AS, Breukink E, Typas A, Vollmer W, Simorre J-PJ-P. 2014.  
809 Outer-membrane lipoprotein LpoB spans the periplasm to stimulate the  
810 peptidoglycan synthase PBP1B. Proc Natl Acad Sci U S A 111:8197–  
811 202. <https://doi.org/10.1073/pnas.1400376111>
- 812 54. Müller P, Ewers C, Bertsche U, Anstett M, Kallis T, Breukink E, Fraipont  
813 C, Terrak M, Nguyen-Distèche M, Vollmer W. 2007. The essential cell  
814 division protein FtsN interacts with the murein (peptidoglycan) synthase  
815 PBP1B in *Escherichia coli*. J Biol Chem 282:36394–36402.  
816 doi: 10.1074/jbc.M706390200
- 817 55. Pazos M, Peters K, Casanova M, Palacios P, VanNieuwenhze M,  
818 Breukink E, Vicente M, Vollmer W. 2018. Z-ring membrane anchors  
819 associate with cell wall synthases to initiate bacterial cell division. Nat  
820 Commun 9:5090. <https://doi.org/10.1038/s41467-018-07559-2>
- 821 56. Lutkenhaus J. 2009. FtsN - Trigger for septation. J Bacteriol 191:7381–  
822 7382. <https://doi.org/10.1128/JB.01100-09>
- 823 57. Gerding MA, Liu B, Bendezú FO, Hale CA, Bernhardt TG, De Boer PAJ.  
824 2009. Self-enhanced accumulation of FtsN at division sites and roles for  
825 other proteins with a SPOR domain (DamX, DedD, and RlpA) in  
826 *Escherichia coli* cell constriction. J Bacteriol 191:7383–7401.  
827 <https://doi.org/10.1128/JB.00811-09>
- 828 58. Singh SK, Parveen S, SaiSree L, Reddy M. 2015. Regulated proteolysis  
829 of a cross-link-specific peptidoglycan hydrolase contributes to bacterial  
830 morphogenesis. Proc Natl Acad Sci 112:10956–10961.  
831 <https://doi.org/10.1073/pnas.1507760112>
- 832 59. Singh SK, Saisree L, Amrutha RN, Reddy M. 2012. Three redundant  
833 murein endopeptidases catalyse an essential cleavage step in  
834 peptidoglycan synthesis of *Escherichia coli* K12. Mol Microbiol 86:1036–  
835 1051. <https://doi.org/10.1111/mmi.12058>
- 836 60. Gibson DG, Young L, Chuang R-Y, Venter JC, Hutchison CA, Smith HO.  
837 2009. Enzymatic assembly of DNA molecules up to several hundred

- 838 kilobases. Nat Methods 6:343–345. <https://doi.org/10.1038/nmeth.1318>
- 839 61. Standage-Beier K, Zhang Q, Wang X. 2015. Targeted Large-Scale  
840 Deletion of Bacterial Genomes Using CRISPR-Nickases. ACS Synth  
841 Biol 4:1217–1225. <https://doi.org/10.1021/acssynbio.5b00132>
- 842 62. Meiresonne NY, Alexeeva S, van der Ploeg R, den Blaauwen T. 2018.  
843 Detection of Protein Interactions in the Cytoplasm and Periplasm of  
844 *Escherichia coli* by Förster Resonance Energy Transfer. Bio-protocol  
845 8:e2697. DOI: [10.21769/BioProtoc.2697](https://doi.org/10.21769/BioProtoc.2697)
- 846 63. Glauner B. 1988. Separation and quantification of mucopeptides with  
847 high-performance liquid chromatography. Anal Biochem 172:451–464.  
848 [https://doi.org/10.1016/0003-2697\(88\)90468-X](https://doi.org/10.1016/0003-2697(88)90468-X)
- 849 64. Vischer NOE, Verheul J, Postma M, van den Berg van Saparoea B,  
850 Galli E, Natale P, Gerdes K, Luirink J, Vollmer W, Vicente M, den  
851 Blaauwen T. 2015. Cell age dependent concentration of *Escherichia coli*  
852 divisome proteins analyzed with ImageJ and ObjectJ. Front Microbiol  
853 6:1–18. <https://doi.org/10.3389/fmicb.2015.00586>
- 854
- 855

**Table 1.** Summary of the calculated acceptor FRET efficiencies ( $E_{fA}$ ) from spectral FRET measurements for listed samples.

| Parameter                              | Proteins expressed        |                              | $E_{fA}$ (%) | SD (%) | N <sup>1</sup> |
|----------------------------------------|---------------------------|------------------------------|--------------|--------|----------------|
|                                        | pTHV037                   | pSAV057                      |              |        |                |
| <b>Positive control<sup>2</sup></b>    |                           |                              |              |        |                |
| Tandem                                 | Empty plasmid             | mKO-mCh                      | 31.0         | 4.0    | 22             |
| <b>Negative control<sup>3</sup></b>    |                           |                              |              |        |                |
| RodA-GlpT                              | mCh-RodA                  | mKO-(GGG) <sub>2</sub> -GlpT | 1.1          | 3.5    | 24             |
| <b>Biological interactions</b>         |                           |                              |              |        |                |
| RodA <sup>4</sup> -PBP2 <sup>WT</sup>  | mCh-RodA                  | mKO-PBP2 <sup>WT</sup>       | 12.7         | 1.7    | 16             |
| RodA <sup>R109A</sup> -PBP2            | mCh-RodA <sup>R109A</sup> | mKO-PBP2 <sup>WT</sup>       | 12.5         | 1.9    | 4              |
| RodA <sup>Q207R</sup> -PBP2            | mCh-RodA <sup>Q207R</sup> | mKO-PBP2 <sup>WT</sup>       | 12.7         | 1.2    | 4              |
| RodA-PBP2 <sup>S330C</sup>             | mCh-RodA                  | mKO-PBP2 <sup>S330C</sup>    | 10.9         | 0.5    | 3              |
| RodA-MalFNT-PBP2                       | mCh-RodA                  | mKO-MalFNT-PBP2              | 14.4         | 1.7    | 4              |
| RodA-MalF37-PBP2                       | mCh-RodA                  | mKO-MalF37-PBP2              | 8.2          | 1.3    | 3              |
| RodA-PBP2 <sup>L61R</sup>              | mCh-RodA                  | mKO-PBP2 <sup>L61R</sup>     | 12.8         | 2.8    | 8              |
| RodA-RodA <sup>WT</sup>                | mCh-RodA                  | mKO-RodA                     | 5.5          | 1.4    | 4              |
| MreB <sup>SW</sup> -RodA               | mCh-MreB <sup>SW5</sup>   | mKO-RodA                     | 7.2          | 3.4    | 4              |
| PBP2 <sup>WT</sup> -PBP2 <sup>WT</sup> | mCh-PBP2 <sup>WT</sup>    | mKO-PBP2                     | 9.2          | 0.5    | 4              |
| PBP2-MalFNT-PBP2                       | mCh-PBP2 <sup>WT</sup>    | mKO-MalFNT-PBP2              | 10.5         | 2.0    | 4              |
| MreC-PBP2 <sup>WT</sup>                | mCh-MreC                  | mKO-PBP2 <sup>WT</sup>       | 5.1          | 1.2    | 6              |
| MreC-MalFNT-PBP2                       | mCh-MreC                  | mKO-MalFNT-PBP2              | 5.4          | 1.7    | 6              |
| MreC-PBP2 <sup>L61R</sup>              | mCh-MreC                  | mKO-PBP2 <sup>L61R</sup>     | 5.3          | 0.6    | 2              |
| MreD-PBP2 <sup>WT</sup>                | mCh-MreD                  | mKO-PBP2 <sup>WT</sup>       | 4.3          | 1.2    | 10             |
| MreD-MalFNT-PBP2                       | mCh-MreD                  | mKO-MalFNT-PBP2              | 5.3          | 1.6    | 10             |
| MreCD <sup>6</sup> -PBP2 <sup>WT</sup> | mCh-MreCD                 | mKO-PBP2 <sup>WT</sup>       | 3.3          | 0.5    | 6              |
| MreCD <sup>7</sup> -MalFNT-PBP2        | mCh-MreCD                 | mKO-MalFNT-PBP2              | 5.4          | 1.1    | 5              |
| <b>+ mecillinam</b>                    |                           |                              |              |        |                |
| <b>Positive control</b>                |                           |                              |              |        |                |
| Tandem                                 | Empty vector              | mKO-mCh                      | 31.0         | 0.6    | 2              |
| <b>Negative control</b>                |                           |                              |              |        |                |
| RodA-GlpT                              | mCh-RodA                  | mKO-(GGG) <sub>2</sub> -GlpT | 3.1          | 0.1    | 2              |
| <b>Biological interactions</b>         |                           |                              |              |        |                |
| RodA-PBP2 <sup>WT</sup>                | mCh-RodA                  | mKO-PBP2 <sup>WT</sup>       | 8.6          | 1.1    | 6              |
| RodA-MalF37-PBP2                       | mCh-RodA                  | mKO-MalF37-PBP2              | 3.0          | 2.0    | 4              |
| RodA-PBP2 <sup>S330C</sup>             | mCh-RodA                  | mKO-PBP2 <sup>S330C</sup>    | 7.9          | 1.0    | 2              |
| RodA-PBP2 <sup>L61R</sup>              | mCh-RodA                  | mKO-PBP2 <sup>L61R</sup>     | 9.7          | 2.2    | 3              |

<sup>1</sup> No, number of biological repeats;

<sup>2,3</sup> Here all measured positive and negative controls are averaged. In the figures the controls are included that belong to the corresponding measurements.

<sup>4</sup> RodA without superscript represent the wild type version.

<sup>5</sup> mCh-MreB<sup>SW</sup> is a sandwich fusion of MreB-mCherry-MreB (33).

<sup>6,7</sup> MreC and MreD were expressed from one plasmid, and MreC was fused to mCherry while MreD was non-fused.

**Table 2.** Summary of the calculated acceptor FRET ( $E_f$ ) efficiencies from spectral FRET measurements for listed samples.

| Parameter                                 | FRET pairs             |                              | Third plasmid |           |   |              |           |   |              |           |   |
|-------------------------------------------|------------------------|------------------------------|---------------|-----------|---|--------------|-----------|---|--------------|-----------|---|
|                                           |                        |                              | Empty vector  |           |   | MreC         |           |   | MreCD        |           |   |
|                                           | pTHV037                | pSAV057                      | $E_f$<br>(%)  | SD<br>(%) | N | $E_f$<br>(%) | SD<br>(%) | N | $E_f$<br>(%) | SD<br>(%) | N |
| <b>Positive control</b>                   |                        |                              |               |           |   |              |           |   |              |           |   |
| Tandem                                    | Empty vector           | mKO-mCh                      | 30.4          | 1.9       | 4 | 31.3         | 3.2       | 3 | 31.7         | 4.3       | 2 |
| <b>Negative control</b>                   |                        |                              |               |           |   |              |           |   |              |           |   |
| RodA-GlpT                                 | mCh-RodA               | mKO-(GGG) <sub>2</sub> -GlpT | 2.4           | 1.3       | 7 | 2.2          | 1.1       | 2 | 1.4          | 2.1       | 4 |
| <b>Biological interactions</b>            |                        |                              |               |           |   |              |           |   |              |           |   |
| RodA-PBP2 <sup>WT</sup>                   | mCh-RodA               | mKO-PBP2 <sup>WT</sup>       | 8.8           | 1.1       | 6 | 4.9          | 0.6       | 2 | 9.2          | 1.5       | 4 |
| RodA <sup>MalFNT</sup> PBP2               | mCh-RodA               | mKO <sup>MalFNT</sup> PBP2   | 7.6           | 1.8       | 5 | 4.2          | 0.3       | 2 | 5.5          | 1.7       | 4 |
| PBP2 <sup>WT</sup> -PBP2 <sup>WT</sup>    | mCh-PBP2 <sup>WT</sup> | mKO-PBP2 <sup>WT</sup>       | 10.6          | 2.1       | 6 | 8.6          | 1.4       | 2 | 9.8          | 1.2       | 4 |
| PBP2 <sup>WT</sup> <sub>MalFNT</sub> PBP2 | mCh-PBP2 <sup>WT</sup> | mKO <sup>MalFNT</sup> PBP2   | 9.4           | 3.5       | 5 | 9.8          | 1.9       | 2 | 8.7          | 1.8       | 4 |

**N**, number of samples measured.



**Table 3.** Summary of mucopeptide composition of LMC500 strains carrying no plasmid or different expression plasmids.

| Muropeptides <sup>2</sup> or feature  | Percent peak area (%) <sup>1</sup> |            |                               |                                 |                 |
|---------------------------------------|------------------------------------|------------|-------------------------------|---------------------------------|-----------------|
|                                       | LMC500                             | LMC500 mKO | LMC500 mKO-PBP2 <sup>WT</sup> | LMC500 mKO-PBP2 <sup>L61R</sup> | LMC500 mKO-GlpT |
| Monomers (total)                      | 52.6 ± 0.1                         | 52.0 ± 0.0 | 52.1 ± 1.1                    | 52.2 ± 0.9                      | 52.2 ± 0.0      |
| dipeptides                            | 1.4 ± 0.0                          | 1.6 ± 0.1  | 1.3 ± 0.1                     | 1.2 ± 0.0                       | 1.4 ± 0.0       |
| tripeptides                           | 5.0 ± 0.2                          | 5.0 ± 0.0  | 5.0 ± 0.5                     | 4.0 ± 0.3                       | 4.7 ± 0.1       |
| tetrapeptides                         | 41.6 ± 0.0                         | 41.0 ± 0.0 | 41.3 ± 0.5                    | 43.3 ± 2.0                      | 41.8 ± 0.2      |
| anhydro                               | 0.9 ± 0.0                          | 1.0 ± 0.0  | 1.0 ± 0.0                     | 0.7 ± 0.0                       | 1.0 ± 0.0       |
| LysArg                                | 3.7 ± 0.4                          | 3.4 ± 0.2  | 3.5 ± 0.5                     | 3.0 ± 1.2                       | 3.4 ± 0.5       |
| Dimers (total)                        | 40.5 ± 0.0                         | 40.8 ± 0.0 | 40.2 ± 0.7                    | 41.7 ± 0.9                      | 40.7 ± 0.1      |
| tetrapeptide                          | 3.1 ± 0.3                          | 3.0 ± 0.2  | 3.0 ± 0.1                     | 2.2 ± 0.0                       | 2.9 ± 0.1       |
| tetratrapeptide                       | 36.0 ± 1.0                         | 36.3 ± 0.2 | 35.0 ± 2.6                    | 37.1 ± 2.7                      | 36.0 ± 0.9      |
| anhydro                               | 2.0 ± 0.0                          | 2.1 ± 0.0  | 2.2 ± 0.0                     | 1.7 ± 0.0                       | 2.0 ± 0.0       |
| LysArg                                | 1.6 ± 0.0                          | 1.7 ± 0.1  | 1.5 ± 0.2                     | 1.2 ± 0.2                       | 1.6 ± 0.1       |
| Trimers (Total)                       | 4.4 ± 0.1                          | 4.6 ± 0.1  | 4.8 ± 0.0                     | 3.8 ± 0.0                       | 4.5 ± 0.1       |
| Dipeptides (total)                    | 1.4 ± 0.0                          | 1.6 ± 0.1  | 1.3 ± 0.1                     | 1.2 ± 0.0                       | 1.4 ± 0.0       |
| Tripeptides (total)                   | 7.2 ± 0.9                          | 7.2 ± 0.2  | 7.6 ± 1.1                     | 6.3 ± 0.7                       | 7.0 ± 0.3       |
| Tetrapeptides (total)                 | 85.8 ± 0.1                         | 85.8 ± 0.0 | 85.3 ± 0.1                    | 87.7 ± 0.0                      | 86.2 ± 0.0      |
| Chain ends (anhydro)                  | 2.3 ± 0.0                          | 2.4 ± 0.0  | 2.5 ± 0.0                     | 1.9 ± 0.0                       | 2.3 ± 0.0       |
| Glycan chain length (DS) <sup>3</sup> | 42.8 ± 0.2                         | 40.5 ± 0.0 | 38.3 ± 0.1                    | <b>52.1 ± 0.5</b>               | 41.6 ± 0.0      |
| Degree of cross-linkage               | 23.2 ± 0.1                         | 23.4 ± 0.0 | 23.3 ± 0.1                    | 23.3 ± 0.2                      | 23.3 ± 0.0      |
| % Peptides in cross-links             | 47.4 ± 0.1                         | 48.0 ± 0.0 | 48.0 ± 1.1                    | 47.8 ± 0.9                      | 47.8 ± 0.0      |

values are mean ± variation of two biological replicates.

<sup>2</sup> muropeptide names according to Glauner, 1988 (63).

<sup>3</sup> average glycan chain length in disaccharide (DS) units calculated from the percentage of anhydro-MurNAc containing muropeptides. The bold number highlights the increased average glycan chain length in cells expressing PBP2<sup>L61R</sup>.

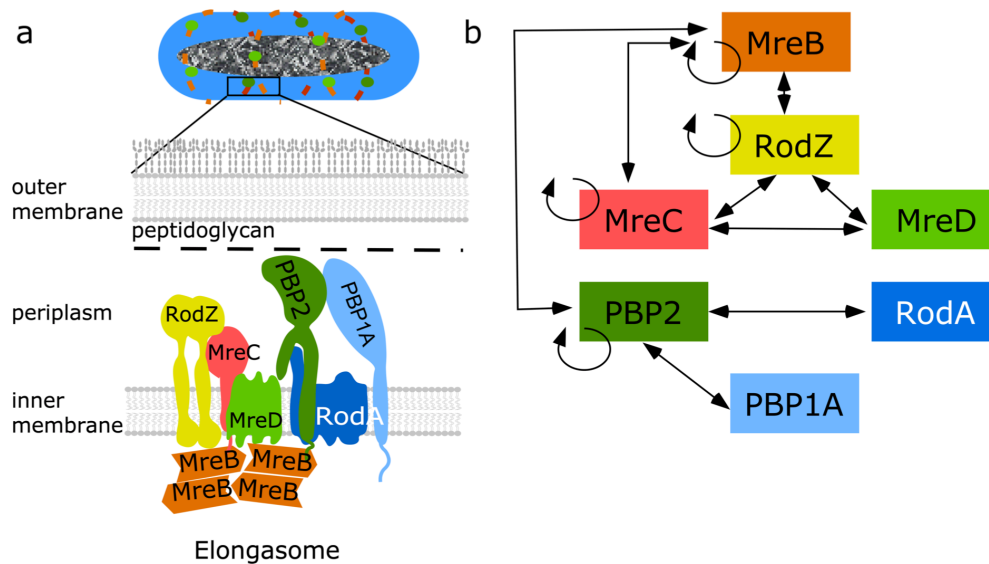

**Figure 1. Core elongasome proteins and their interactions in *E. coli*.** **a.** Schematic representation of the *E. coli* cell envelope and elongasome. MreB localizes in patches underneath the cytoplasmic membrane and recruits other elongasome proteins. The peptidoglycan layer is sandwiched by the cytoplasmic membrane and the outer membrane. **b.** Identified interactions between elongasome proteins from previous interaction studies (1-5). Double arrowed lines represent the interaction between different proteins. Circular arrows indicate self-interaction.

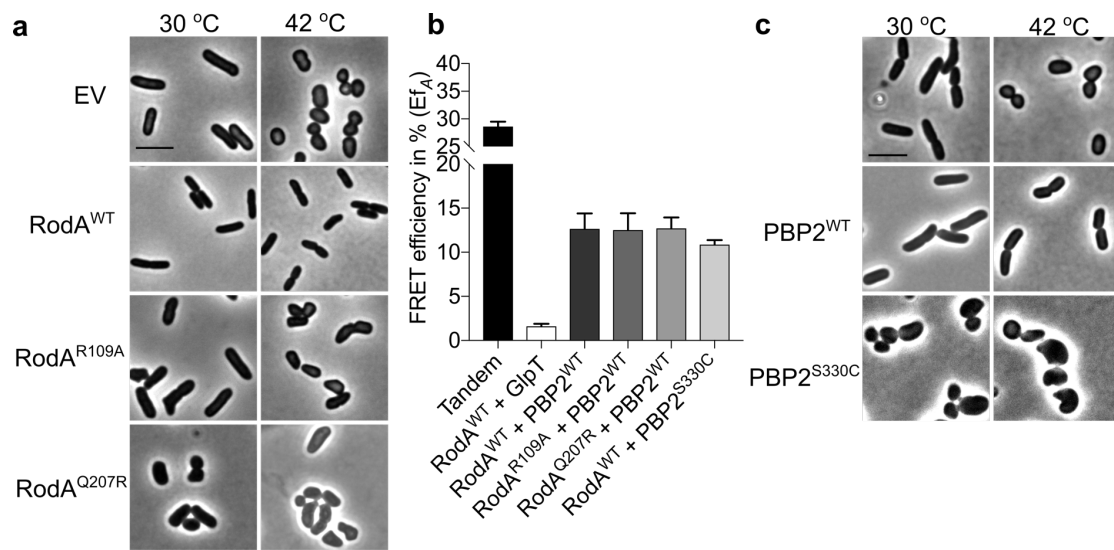

**Figure 2. Activity of RodA and PBP2 are not required for their interaction.** **a**, Phase contrast images of the complementation of RodA variants. RodA temperature sensitive strain LMC882 was transformed with plasmids expressing RodA variants and grown in LB medium at 30 °C (left panel) and 42 °C (right panel) for 2 mass doublings (with 15  $\mu$ M IPTG induction). EV, empty vector. **b**, Calculated acceptor FRET efficiencies ( $E_{fA}$ ) between PBP2 and RodA variants from spectral FRET measurements. RodA and its variants are fused with mCherry. PBP2 and its variants are fused with mKO. **c**, Phase contrast images of the complementation of PBP2 variants. The PBP2 temperature sensitive strain LMC582 was transformed with PBP2<sup>WT</sup> or PBP2<sup>S330C</sup>, and grown in LB medium at 30 °C (left panel) and 42 °C (right panel) for 2 mass doublings (with 15  $\mu$ M IPTG induction). Scale bar equals 5  $\mu$ m. All the results in the figure are representative of at least three independent experiments.

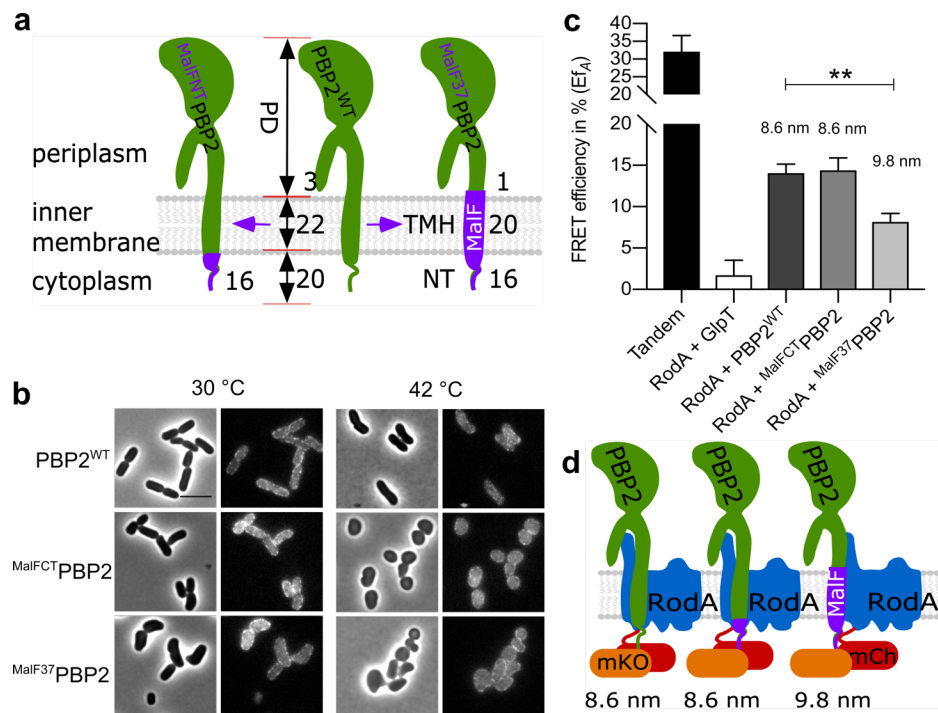

**Figure 3. Functionality and interaction of PBP2 domain swap mutants.** **a.** Schematic illustration of PBP2 domain-swap mutants. NT: N-terminus; TMH: transmembrane helix; PD: periplasmic domain; PBP2<sup>WT</sup>: wild type PBP2; MalF<sup>NT</sup>PBP2: the cytoplasmic N-terminus of PBP2 was replaced with the MalF cytoplasmic N-terminus; MalF<sup>37</sup>PBP2: the NT and TMH domains of PBP2 were replaced with corresponding domains of MalF. Numbers indicate the residues involved in replacements in each domain of the proteins. **b.** Phase contrast and fluorescence images of the complementation of PBP2 mutants. The PBP2 temperature sensitive strain LMC582 was transformed with the PBP2 variants, and grown in LB medium at 30 °C (left panels) and 42 °C (right panels) for 2 mass doublings (with 15 μM IPTG induction). Scale bar equals 5 μm. **c.** Calculated acceptor FRET efficiencies (E<sub>F</sub>) between PBP2 and RodA variants from spectral FRET measurements. RodA and its variants are fused with mCherry. PBP2 and its variants are fused with mKO. P value determined with Student's t-test (\*\*: p<0.001). The numbers are apparent distances between the two proteins (fluorophores) and were calculated using the equation,  $E = (1+(r/R_0)^6)^{-1}$ , where r is the distance between the chromophores and R<sub>0</sub> (the Förster distance) is 6.4 nm for the mCh-mKO pair. **d.** Schematic illustration of the interaction between RodA and PBP2 variants. After replacement of the TMH domain of PBP2, by the TMH of MalF, the FRET efficiency is lower indicating that the distance between the FP fused TMHs of PBP2 and RodA has increased. However the interaction is not lost, indicating

that periplasmic domains are also involved in the interaction All results in the figure are representative of at least three independent experiments.

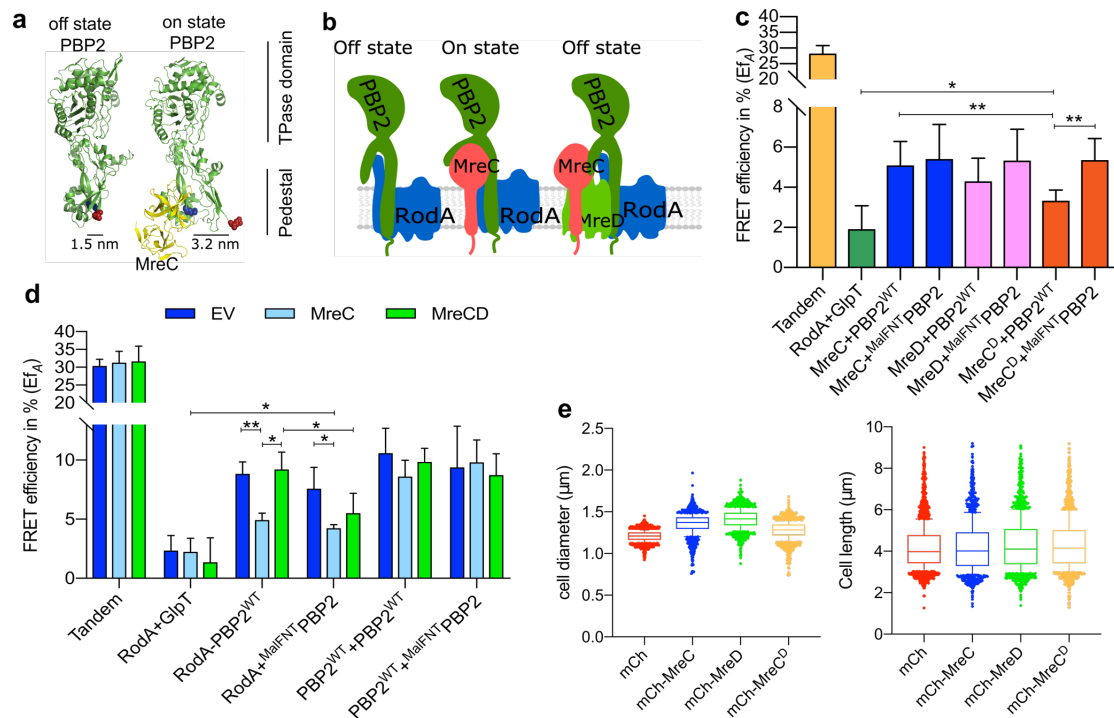

**Figure 4. The balance of MreC and MreD affects the interaction between RodA and PBP2.**

**a.** Crystal structures of *E. coli* PBP2 in different conformations (6) were modeled from *Helicobacter pylori* PBP2 structures (7) using Phyre2 (8). The structural information lacks the juxta-membrane, transmembrane helix and cytoplasmic regions of PBP2. MreC binds to PBP2 and was proposed to switch PBP2 from the “off state” to the “on state” (7). The distances between the two sphered residues, (blue for Glu157) and (red for Lys60) were calculated based on the structure of PBP2 in the different conformations. **b.** Schematic representation of PBP2 conformational changes caused by MreC. Left panels: PBP2 stays in the “off state” in the absence of MreC (the distance between the cytoplasmic terminus of RodA and PBP2 is small); middle panels: PBP2 switches to the “on state” after binding MreC (the distance between cytoplasmic terminus of RodA and PBP2 is larger), right panels: MreD suppresses the MreC-mediated conformational change of PBP2 and keeps PBP2 in the “off state”. **c.** Calculated acceptor FRET efficiencies ( $E_f$ ) between MreCD proteins and RodA variants from spectral FRET measurements. MreC: mCherry fused MreC; MreD: mCherry fused MreD; MreC<sup>D</sup>: MreCD co-expressed from the same plasmid, and MreC is fused with mCherry while MreD is non-fused. PBP2 and its variants are fused with mKO. **d.** Calculated acceptor FRET efficiencies ( $E_f$ ) between RodA and PBP2 variants from spectral FRET measurements in the three-plasmids FRET experiments. EV: a third empty vector; MreC: a third plasmid expressing non-

fused MreC; MreCD: a third plasmid expressing non-fused MreCD. **e.** Cell length and diameter changes after expressing MreC, MreD or MreCD together. LMC500 strain was transformed with each construct and grown in LB medium at 37 °C and induced with 15  $\mu$ M IPTG for 2 mass doublings. Proteins were expressed from the pSAV057 derived plasmids (mKO: control; MreC: mKO fused MreC; MreD: mKO fused MreD; MreC<sup>D</sup>: co-expression of MreC and MreD, MreC is fused with mKO while MreD is not fused. About 1000 cells were analyzed. P value determined with Student's t-test (\*:  $p < 0.05$ ,; \*\*:  $p < 0.01$ :).

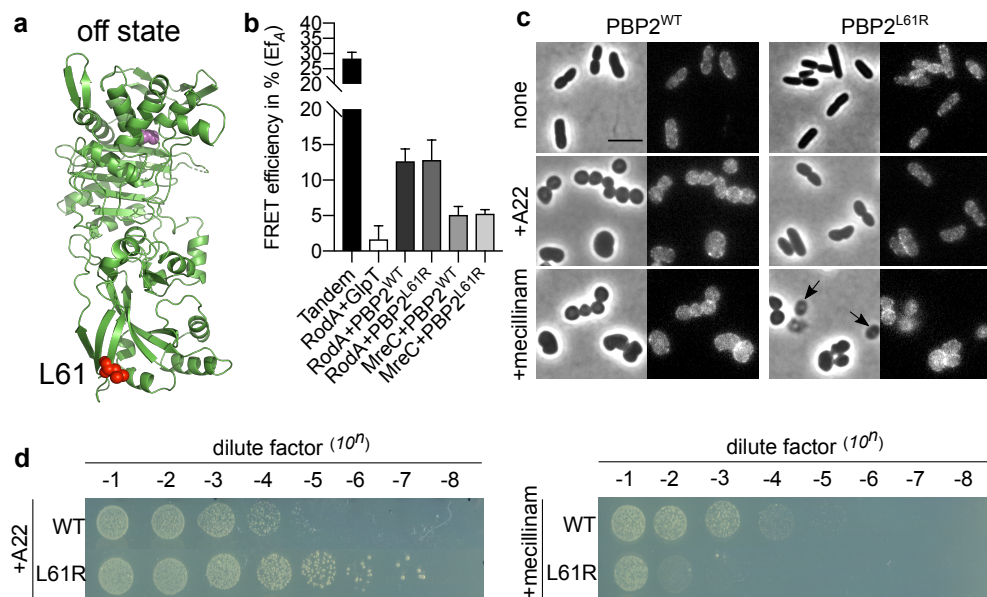

**Figure 5. Hyperactive mutant PBP2<sup>L61R</sup> is more sensitive to mecillinam.** **a.** Modeled “off state” structure of *E. coli* PBP2 from *H. pylori* PBP2 using Phyre 2 (8). Structural information lacks on the juxta-membrane, transmembrane helix and cytoplasmic regions of PBP2. Residue Leu61 is colored in red and shown as spheres. Active site Ser330 is colored in pink and shown as spheres. **b.** Hyperactive mutant PBP2<sup>L61R</sup> interacts similar like PBP2<sup>WT</sup> with RodA and MreC. RodA and MreC were fused with mCherry, and PBP2<sup>WT</sup> and PBP2<sup>L61R</sup> were fused with mKO. **c.** Phase contrast and fluorescence images of cells expressing PBP2<sup>L61R</sup> were less sensitive to A22 but hypersensitive to mecillinam in liquid culture. LMC500 strain expressing nothing, or PBP2<sup>WT</sup>, or PBP2<sup>L61R</sup> were grown in LB medium at 37 °C. IPTG induction (15  $\mu$ M), and A22 treatment (10  $\text{mg}\cdot\text{L}^{-1}$ ) or mecillinam treatment (2  $\text{mg}\cdot\text{L}^{-1}$ ) were applied to each culture for 2 mass doublings. Arrows indicate cells that lysed after mecillinam treatment in the PBP2<sup>L61R</sup> culture. Scale bar equals 5  $\mu$ m. **d.** Spot assay to test the sensitivities of PBP2<sup>WT</sup> and PBP2<sup>L61R</sup> to A22 (10  $\text{mg}\cdot\text{L}^{-1}$ ) and mecillinam (2  $\text{mg}\cdot\text{L}^{-1}$ ).



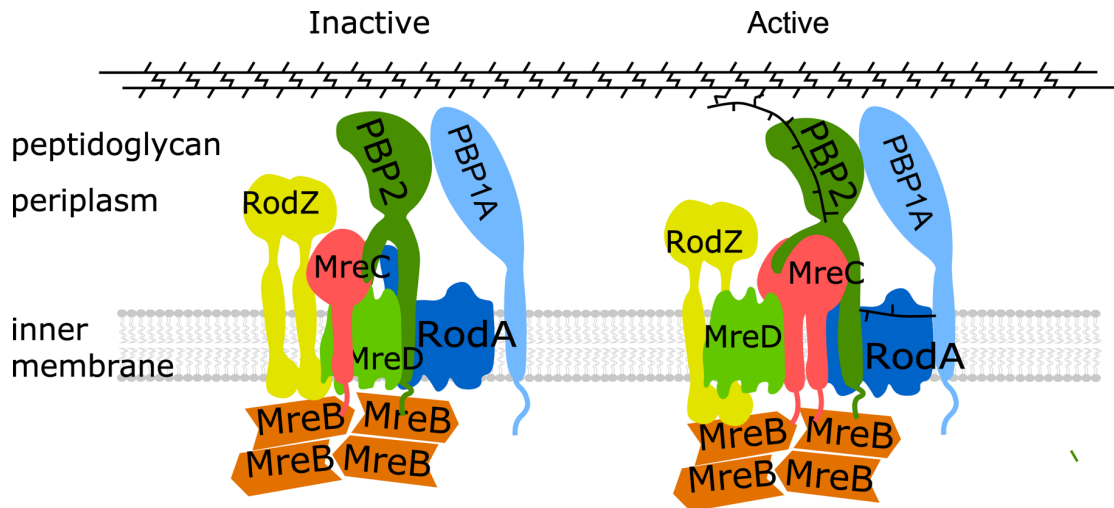

**Figure 6. Model for regulation of elongasome and PG synthesis.** RodA and PBP2 interact with each other and form a stable subcomplex. MreC and RodZ interact strongly with MreB filaments that likely link MreB to the PG synthesis proteins. MreC interacts with PBP2 that could stimulate and activate PBP2, while MreD, which interacts with both PBP2 and MreC, suppresses the activation of PBP2 by MreC, and keeps PG synthesis under control. The accumulation of MreC to the elongasome will finally abolish the inhibition of MreD and activate PBP2 by changing its conformation from the “off state” to the “on state”, and subsequently activate the elongasome and PG synthesis.

## References:

1. Kruse T, Bork-Jensen J, Gerdes K. 2005. The morphogenetic MreBCD proteins of *Escherichia coli* form an essential membrane-bound complex. *Mol Microbiol* 55:78–89. <https://doi.org/10.1111/j.1365-2958.2004.04367.x>
2. Bendezú FO, Hale CA, Bernhardt TG, De Boer PAJ. 2009. RodZ (YfgA) is required for proper assembly of the MreB actin cytoskeleton and cell shape in *E. coli*. *EMBO J* 28:193–204. <https://doi.org/10.1038/emboj.2008.264>
3. Ikebe R, Kuwabara Y, Chikada T, Niki H, Shiomi D. 2018. The periplasmic disordered domain of RodZ promotes its self-interaction in *Escherichia coli*. *Genes to Cells* 23:307–317. <https://doi.org/10.1111/gtc.12572>
4. Banzhaf M, van den Berg van Saparoea B, Terrak M, Fraipont C, Egan A, Philippe J,

- Zapun A, Breukink E, Nguyen-Distèche M, den Blaauwen T, Vollmer W. 2012. Cooperativity of peptidoglycan synthases active in bacterial cell elongation. *Mol Microbiol* 85:179–194. <https://doi.org/10.1111/j.1365-2958.2012.08103.x>
5. van der Ploeg R, Goudelis ST, den Blaauwen T. 2015. Validation of FRET assay for the screening of growth inhibitors of *Escherichia coli* reveals elongasome assembly dynamics. *Int J Mol Sci* 16:17637–17654. <https://doi.org/10.3390/ijms160817637>
  6. Rohs PDA, Buss J, Sim SI, Squyres GR, Srisuknimit V, Smith M, Cho H, Sjodt M, Kruse AC, Garner EC, Walker S, Kahne DE, Bernhardt TG. 2018. A central role for PBP2 in the activation of peptidoglycan polymerization by the bacterial cell elongation machinery. *PLoS Genet* 14:1–25. <https://doi.org/10.1371/journal.pgen.1007726>
  7. Contreras-Martel C, Martins A, Ecobichon C, Trindade DM, Matteï P-J, Hicham S, Hardouin P, Ghachi M El, Boneca IG, Dessen A. 2017. Molecular architecture of the PBP2–MreC core bacterial cell wall synthesis complex. *Nat Commun* 8:776. <https://doi.org/10.1038/s41467-017-00783-2>
  8. Kelley LA, Sternberg MJE. 2009. Protein structure prediction on the Web: a case study using the Phyre server. *Nat Protoc* 4:363. <https://doi.org/10.1038/nprot.2009.2>
